# Supplementary material
Source: ML conference proceedings conference paper supplement (https://proceedings.neurips.cc/paper_files/paper/2021/hash/3bbfdde8842a5c44a0323518eec97cbe-Abstract.html)
Supplement: Supplementary file [file 3bbfdde8842a5c44a0323518eec97cbe-Supplemental.pdf]

---

# Supplementary of “HRT: High-Resolution Transformer for Dense Prediction”

---

Anonymous Author(s)

Affiliation

Address

email

## 1 Comparison with the SOTA on semantic segmentation task.

2 We add the comparison with the co-current SOTA methods such as Swin [2] and DPT-Hybrid [3] on  
3 more datasets. Above all, we show that increasing the window size of the local-window attention  
4 within HRT-B from  $7 \times 7$  to  $15 \times 15$  gains 0.6%, 1.2%, 0.8%, and 2.4% on Cityscapes val, PASCAL-  
5 Context test, COCO-Stuff test, and ADE20K val with slightly more parameters and FLOPs. The  
6 reason for using the large window size is that the depth of our HRT-B is relatively small. For example,  
7 HRT-B consists of only 10 transformer encoder layers (on the deepest network branch) while both  
8 Swin-S and Swin-B [2] consist of 24 transformer encoder layers.

9 Compared to the co-current SOTA transformer methods, HRT-B + OCR ( $15 \times 15$ ) performs better  
10 on both Cityscapes and COCO-Stuff. For PASCAL-Context, the DPT-Hybrid [3] achieves the best  
11 performance via pre-training their models on the ADE20K. For ADE20K, HRT-B + OCR ( $15 \times 15$ )  
12 outperforms Swin-B + UperNet by 0.3% with 50% fewer parameters, and SETR-MLA achieves the  
13 best performance on ADE20K with nearly  $2 \times$  more FLOPs and  $5 \times$  more parameters.

Table 1: **Comparison with the recent SOTA on semantic segmentation tasks.** We report the mIoUs on Cityscapes val, PASCAL-Context test, COCO-Stuff test, and ADE20K val. The number of parameters and FLOPs are measured on the image size of  $1024 \times 1024$ , and the output label map size of  $19 \times 1024 \times 1024$ . All results are evaluated with multi-scale testing. ‡: the results are obtained with extra pre-training on ADE20K.  $7 \times 7$  and  $15 \times 15$  marks the window size.

| Method                             | #params. | FLOPs    | Cityscapes | PASCAL-Context | COCO-Stuff | ADE20K |
|------------------------------------|----------|----------|------------|----------------|------------|--------|
| <i>Transformer as backbone</i>     |          |          |            |                |            |        |
| SETR-PUP [6]                       | 317.8M   | 2326.7G  | 82.2       | 55.3           | —          | 50.1   |
| SETR-MLA [6]                       | 309.5M   | 2138.6G  | —          | 55.8           | —          | 50.3   |
| Swin-S + UperNet [2]               | 81.16M   | 1036.50G | —          | —              | —          | 49.5   |
| Swin-B + UperNet [2]               | 121.18M  | 1187.90G | —          | —              | —          | 49.7   |
| <i>CNN as backbone</i>             |          |          |            |                |            |        |
| Deeplabv3 [1]                      | 87.1M    | 1394.0G  | 80.7       | 54.1           | —          | —      |
| PSPNet [5]                         | 68.0M    | 1028.8G  | 80.0       | 54.0           | 43.3       | —      |
| HRNet-W48 + OCR [4]                | 74.5M    | 924.7G   | —          | 56.2           | 40.5       | 45.7   |
| <i>CNN+Transformer as backbone</i> |          |          |            |                |            |        |
| DPT-Hybrid [3]                     | 124.0M   | 1231.5G  | —          | 60.5‡          | —          | 49.0   |
| HRT-B + OCR ( $7 \times 7$ )       | 56.0M    | 1051.6G  | 82.0       | 57.3           | 42.5       | 47.6   |
| HRT-B + OCR ( $15 \times 15$ )     | 56.2M    | 1119.9G  | 82.6       | 58.5           | 43.3       | 50.0   |

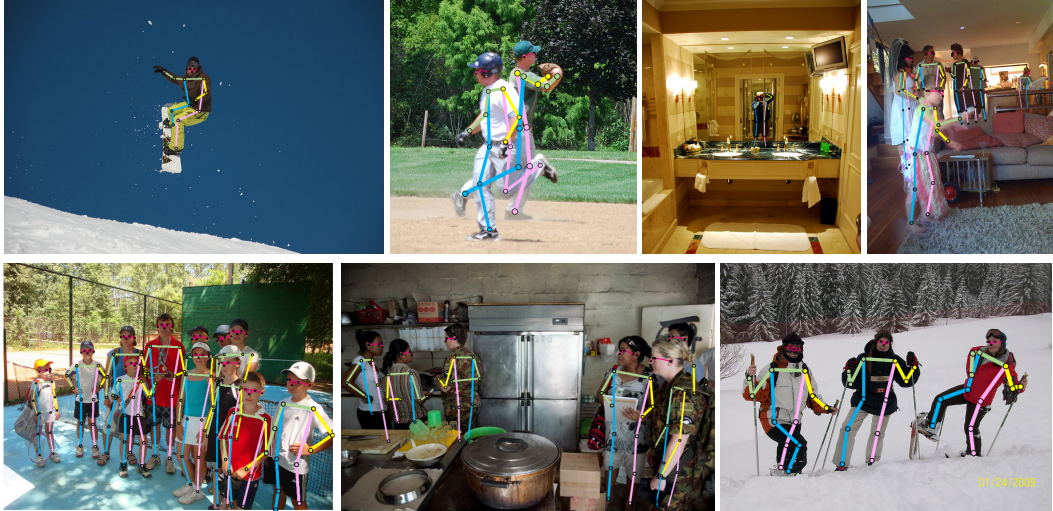

Figure 1: Visualization of the pose estimation results based on HRT-B on COCO val.

## 14 2 More Visualization Results.

15 We present additional visualizations of the example results of our method on both pose estimation  
 16 and semantic segmentation tasks. Figure 1 shows more pose estimation results of HRT-B on COCO  
 17 val. Figure 2 shows more semantic segmentation results on Cityscapes val, PASCAL-Context test  
 18 and COCO-Stuff test.

## 19 References

- 20 [1] Liang-Chieh Chen, George Papandreou, Florian Schroff, and Hartwig Adam. Rethinking atrous  
 21 convolution for semantic image segmentation. *arXiv preprint arXiv:1706.05587*, 2017.
- 22 [2] Ze Liu, Yutong Lin, Yue Cao, Han Hu, Yixuan Wei, Zheng Zhang, Stephen Lin, and Baining  
 23 Guo. Swin transformer: Hierarchical vision transformer using shifted windows. *arXiv preprint*  
 24 *arXiv:2103.14030*, 2021.
- 25 [3] René Ranftl, Alexey Bochkovskiy, and Vladlen Koltun. Vision transformers for dense prediction.  
 26 *ArXiv preprint*, 2021.
- 27 [4] Yuhui Yuan, Xilin Chen, and Jingdong Wang. Object-contextual representations for semantic  
 28 segmentation. *arXiv preprint arXiv:1909.11065*, 2019.
- 29 [5] Hengshuang Zhao, Jianping Shi, Xiaojuan Qi, Xiaogang Wang, and Jiaya Jia. Pyramid scene  
 30 parsing network. In *Proceedings of the IEEE conference on computer vision and pattern*  
 31 *recognition*, pages 2881–2890, 2017.
- 32 [6] Sixiao Zheng, Jiachen Lu, Hengshuang Zhao, Xiatian Zhu, Zekun Luo, Yabiao Wang, Yanwei  
 33 Fu, Jianfeng Feng, Tao Xiang, Philip H.S. Torr, and Li Zhang. Rethinking semantic segmentation  
 34 from a sequence-to-sequence perspective with transformers. In *CVPR*, 2021.
